# Supplementary material for: Reliability and Validity of the Ethiopian Version of the Hospital Anxiety and Depression Scale (HADS) in HIV Infected Patients
Source: PubMed Central journal article supplement (PMC3026786; doi:10.1371/journal.pone.0016049), 2011-01-25
Supplement: pone.0016049.s001.pdf [file pone.0016049.s001.pdf]

**የጭንቀት እና የቁዝማ (ሀዘን) መገምገሚያ መጠይቅ**

ስነልቦና ብዙ በሽታዎች ላይ የራሱ የሆነ ሚና እንዳለው ይታወቃል እናም ሀኪምዎ የሚሰማዎትን ስሜት ካወቁ በደንብ ሊረዱዎት ይችላሉ።

ባለፈው ሣምንት የተሰማዎን ትክክለኛ ስሜት መሠረት በማድረግ የጤና ባለሙያዉ ቀጥሎ ለሚጠይቁዎት ጥያቄ ተገቢውን መልስ ይስጡ።

በተቻለ መጠን ሲመልሱ ብዙ ጊዜ አይወሰዱ፣ ምናልባትም እንደተጠየቁ ወዲያውኑ የመጣልዎት መልስ ትክክለኛ ስሜትዎን ሊገልፅ ይችላል።

1 የመጨነቅ ወይም የመወጠር ስሜት ምን ያህል ይሰማዎታል?

- በጣም ብዙ ጊዜ
- ብዙ ጊዜ
- አልፎ አልፎ
- ምንም አይሰማኝም

|   |  |
|---|--|
| 3 |  |
| 2 |  |
| 1 |  |
| 0 |  |

2 ቀደም ሲል ያስደስቱዎ የነበሩ ነገሮች አሁን ምን ያህል ያስደስቱዎታል?

- አሁንም እንደድሮው ያስደስቱኛል
- ከድሮው ትንሽ ቀንሷል
- በጥቂቱ ያስደስቱኛል
- ጭራሽ አያስደስቱኝም

|   |
|---|
| 0 |
| 1 |
| 2 |
| 3 |

3 አንድ መጥፎ ነገር ሊያጋጥምዎ የተቃረበ የሚመስል የፍርሀት ስሜት ይሰማዎታል?

- እጅግ በጣም ይሠማኛል
- በጣም ይሠማኛል
- በጥቂቱ ይሠማኛል
- ምንም አይሠማኝም

|   |  |
|---|--|
| 3 |  |
| 2 |  |
| 1 |  |
| 0 |  |

4 መሳቅና የነገሮችን አስቂኝ ጎን ማየት ይችላሉ?

- አብዛኛውን ጊዜ እችላለሁ
- እንደድሮው ባይሆንም እችላለሁ
- በጥቂቱ እችላለሁ
- ምንም አልችልም

|   |
|---|
| 0 |
| 1 |
| 2 |
| 3 |

5 ጭንቀትን የሚያጭሩ ሀሳቦች በአእምሮዎ ምን ያህል ጊዜ ይመለሳሉ?

- በጣም ብዙ ጊዜ
- ብዙ ጊዜ
- አብዛኛውን ጊዜ ባይሆንም አልፎ አልፎ
- አንዳንዴ ብቻ

|   |  |
|---|--|
| 3 |  |
| 2 |  |
| 1 |  |
| 0 |  |

6 ደስተኛ ነዎት?

- ምንም ደስተኛ አይደለሁም
- ብዙ ጊዜ ደስተኛ አይደለሁም
- ብዙም ባይሆን ደስተኛ ነኝ
- አብዛኛውን ጊዜ ደስተኛ ነኝ

|   |
|---|
| 3 |
| 2 |
| 1 |
| 0 |

7 ተረጋግተው መቀመጥ እና ዘና ማለት ይችላሉ?

- ሁሌም እችላለሁ
- አብዛኛውን ጊዜ እችላለሁ
- ብዙውን ጊዜ አልችልም
- ምንም አልችልም

|   |  |
|---|--|
| 0 |  |
| 1 |  |
| 2 |  |
| 3 |  |

8 ስራዎን ሲያከናውኑ ወዘተ ፍጥነትዎ ምን ያህል የቀነሰ ይመስልዎታል?

- እጅግ በጣም ብዙ ጊዜ
- በጣም ብዙ ጊዜ
- አልፎ አልፎ
- ምንም አልቀነሰም

|  |   |
|--|---|
|  | 3 |
|  | 2 |
|  | 1 |
|  | 0 |

9 ሆድ አካባቢ የሚሰማ የመደንገጥ ወይም የመሸበር ስሜት ይሰማዎታል?

- ምንም አይሰማኝም
- አልፎ አልፎ
- ብዙ ጊዜ
- በጣም ብዙ ጊዜ

|   |  |
|---|--|
| 0 |  |
| 1 |  |
| 2 |  |
| 3 |  |

10 ለአለባበስዎ ትኩረትን መስጠት አቁመዋል?

- አዎን ምንም ትኩረት እየሠጠሁ አይደለም
- የምፈልገውን ያህል ትኩረት እየሰጠሁ አይደለም
- ድሮ ከምሰጠው ትኩረት በጥቂቱ ያነሰ ትኩረትን እሰጣለሁ
- ሁሌም የምሰጠውን ትኩረት እሰጣለሁ

|  |   |
|--|---|
|  | 3 |
|  | 2 |
|  | 1 |
|  | 0 |

11 አንድ ቦታ መሄድ ያለብዎ ይመስል ተረጋግቶ መቀመጥ ይቸገርዎታል?

- በጣም ብዙ ጊዜ ይቸግረኛል
- ብዙ ጊዜ ይቸግረኛል
- ብዙም አይቸግረኝም
- ምንም አይቸግረኝም

|   |  |
|---|--|
| 3 |  |
| 2 |  |
| 1 |  |
| 0 |  |

12 መጨነቅን በደስታ ይጠብቃሉ?

- አዎ ሁሌም በተለመደው ወይም በድሮው መጠን እጠብቃለሁ
- ከድሮው ወይም ከተለመደው በጥቂቱ ባነሰ መጠን እጠብቃለሁ
- ከድሮው ወይም ከተለመደው ባነሰ መጠን እጠብቃለሁ
- ምንም በደስታ አልፎብቅም

|  |   |
|--|---|
|  | 0 |
|  | 1 |
|  | 2 |
|  | 3 |

13 በድንገት የመደንገጥ ወይም የመሸበር ስሜት ይሰማዎታል?

- በጣም ብዙ ጊዜ ይሰማኛል
- ብዙ ጊዜ ይሰማኛል
- አልፎ አልፎ ይሰማኛል
- ምንም አይሰማኝም

|   |  |
|---|--|
| 3 |  |
| 2 |  |
| 1 |  |
| 0 |  |

14 በራዲዮ ወይም የቴሌቪዥን ኘሮግራሞች ራስዎን ያሰደስታሉ?

- አዎን ብዙ ጊዜ
- ብዙም ባይሆን አዎ
- አልፎ አልፎ
- በጣም አልፎ አልፎ

|  |   |
|--|---|
|  | 0 |
|  | 1 |
|  | 2 |
|  | 3 |
